# Supplementary material for: Polymerization of misfolded Z alpha-1 antitrypsin protein lowers CX3CR1 expression in human PBMCs
Source: eLife. 2021 May 18;10:e64881. doi: 10.7554/eLife.64881 (PMC8205483; doi:10.7554/eLife.64881)
Supplement: Figure 1—source data 1. [file elife-64881-fig1-data1.xlsx]

## Sheet: Fig 1A
Figure 1A-Source data
Group	N	Median	0.25	0.75
CX3CL1 ZZ	53	4.008	2.707	5.526
CX3CL1 M	21	18.482	13.075	26.538

## Sheet: Fig 1B
Figure 1B-Source data
Group	N	Median	0.25	0.75
CX3CL1 ZZ	38	1.08	0.8	1.617
CX3CL1 M	21	1.16	0.825	1.595
