# Supplementary material for: Polymerization of misfolded Z alpha-1 antitrypsin protein lowers CX3CR1 expression in human PBMCs
Source: eLife. 2021 May 18;10:e64881. doi: 10.7554/eLife.64881 (PMC8205483; doi:10.7554/eLife.64881)
Supplement: Figure 2—figure supplement 5—source data 1. [file elife-64881-fig2-figsupp5-data1.xlsx]

## Sheet: Figure 2 - figure  supplement 
Figure 2 - Figure supplement 5A-Source data 1
Normality Test (Shapiro-Wilk):	Passed	(P = 0,133)
Equal Variance Test (Brown-Forsythe):	Passed	(P = 0,484)
Group Name	N	Missing	Mean	Std Dev	SEM
control	8	0	28.041	10.084	3.565
ZAAT 0.5mg	8	0	10.119	5.412	1.913
ligand 100	8	0	25.919	12.049	4.26
ligand+AAT	8	0	12.784	5.934	2.098
ligand 500	8	4	20.325	9.629	4.814
ligand500+AAT	8	4	11.75	5.328	2.664
			p-value
control vs. ZAAT 0.5mg	17.922	4.145	0.003	Yes
control vs. ligand+AAT	15.258	3.529	0.016	Yes
control vs. ligand500+AAT	16.291	3.076	0.048	Yes
