# Supplementary material for: Polymerization of misfolded Z alpha-1 antitrypsin protein lowers CX3CR1 expression in human PBMCs
Source: eLife. 2021 May 18;10:e64881. doi: 10.7554/eLife.64881 (PMC8205483; doi:10.7554/eLife.64881)
Supplement: Figure 2—source data 1. [file elife-64881-fig2-data1.xlsx]

## Sheet: Fig 2A
Figure 2A-Source data
Group	N	Median	0.25	0.75
CX3CR1 control	9	18.2	12.085	20.29
CX3CR1 ZZ treated	9	7.767	3.03	11.07
CX3CR1 LPS	6	2.9	2.672	3.192
