# Supplementary material for: Polymerization of misfolded Z alpha-1 antitrypsin protein lowers CX3CR1 expression in human PBMCs
Source: eLife. 2021 May 18;10:e64881. doi: 10.7554/eLife.64881 (PMC8205483; doi:10.7554/eLife.64881)
Supplement: Figure 3—source data 1. [file elife-64881-fig3-data1.xlsx]

## Sheet: Fig. 3A
Figure 3A-Source data
monocytes
Mean	mean	SD
untreated	1412.5	493.1
LPS	130.3	17.7
ZZ	131	7.4

## Sheet: Fig 3B
Figure 3B-source data
CX3CR1
Mean	mean	SD
untreated	2379.25	321.354
LPS	709.75	289.645
ZZ	1034	86.9368
