# Supplementary material for: Polymerization of misfolded Z alpha-1 antitrypsin protein lowers CX3CR1 expression in human PBMCs
Source: eLife. 2021 May 18;10:e64881. doi: 10.7554/eLife.64881 (PMC8205483; doi:10.7554/eLife.64881)
Supplement: Figure 4—figure supplement 2—source data 1. [file elife-64881-fig4-figsupp2-data1.xlsx]

## Sheet: Fig. 4 Fig suppl 2A
Kruskal-Wallis One Way Analysis of Variance on Ranks
Data source: Data 1 in Notebook1
Group	N	Missing	Median	0.25	0.75
IL-1b mRNA cntr12	0	1.485	0.855	2.488
IL1B mRNA ZZ	12	0	1.6	0.83	2.402
IL1B LPS mRNA	6	0	329.909	303.782	456.798
H = 13,942 with 2 degrees of freedom. (P = <0,001)

## Sheet: Fig. 4 Fig suppl 2B
Kruskal-Wallis One Way Analysis of Variance on Ranks
Data source: Data 1 in Notebook1
Group	N	Missing	Median	0.25	0.75
IL6 mRNA ctr	12	0	0.047	0.0265	0.0658
IL6 mRNA ZZ	12	0	0.0215	0.0173	0.026
IL6 mRNA LPS	6	0	16.69	16.029	20.683
H = 17,490 with 2 degrees of freedom. (P = <0,001)

## Sheet: Fig. 4 Fig suppl 2C
Kruskal-Wallis One Way Analysis of Variance on Ranks
Data source: Data 1 in Notebook1
Group	N	Missing	Median	0.25	0.75
TNF mRNA ctr	12	0	0.75	0.712	1.337
TNF mRNA ZZ	12	0	0.82	0.662	1.377
TNF mRNA LPS	6	0	11.475	9.6	21.905
