# Supplementary material for: Polymerization of misfolded Z alpha-1 antitrypsin protein lowers CX3CR1 expression in human PBMCs
Source: eLife. 2021 May 18;10:e64881. doi: 10.7554/eLife.64881 (PMC8205483; doi:10.7554/eLife.64881)
Supplement: Figure 4—source data 1. [file elife-64881-fig4-data1.xlsx]

## Sheet: Fig. 4A
Figure 4A-Source data
Group Name	N	Mean	Std Dev
PBMCs in vitro CD14 control	14	8.468	5.731
CD14 cells treated with ZZ 0.5	14	19.196	8.621

## Sheet: Fig. 4B
Figure 4B-Source data
CD14
Mean	mean	SD
control	1888	937.2
LPS	17346.5	4260.7
ZZ	8740.3	2631.6
