# Supplementary material for: Polymerization of misfolded Z alpha-1 antitrypsin protein lowers CX3CR1 expression in human PBMCs
Source: eLife journal article supplement (doi:10.7554/elife.64881), 2021-05-18
Supplement: supp [file elife-64881-supp-v1.zip]

**12 ZZ-AATD**

emphysema patients

6 females/6 males

Age, median (range):

60 (41-70) years

Plasma AAT, mean (SD):

0.3 (0.2) g/L

**41 ZZ-AATD**

volunteers

21 females/20 males

Age, median (range):

58 (43-80) years

Plasma AAT, mean (SD):

0.91 (0.47) g/L

**21 non-AATD**

volunteers

14 females/7 males

Age, median (range):

42 (29-63) years

Plasma AAT, mean (SD):

1.23 (0.35) g/L

Peripheral blood sample processing within 6 h

**A: Isolation of  
PBMCs**

**B: Preparation of  
blood plasma**

**Quantitative real-time PCR  
Analysis of Z-AAT polymers**
