# Supplementary figures and images for: Polymerization of misfolded Z alpha-1 antitrypsin protein lowers CX3CR1 expression in human PBMCs
Source: eLife journal article supplement (doi:10.7554/elife.64881), 2021-05-18

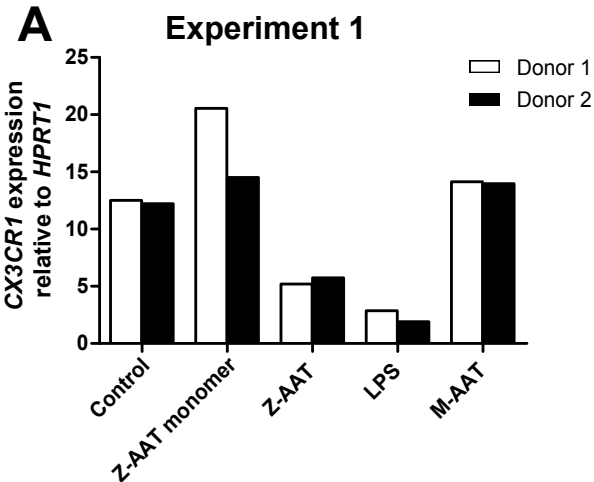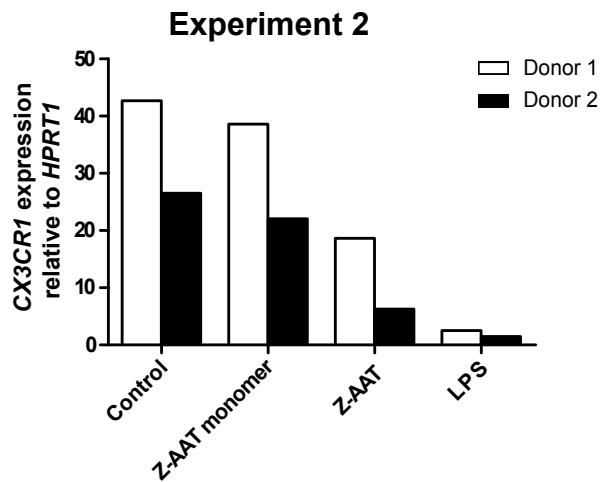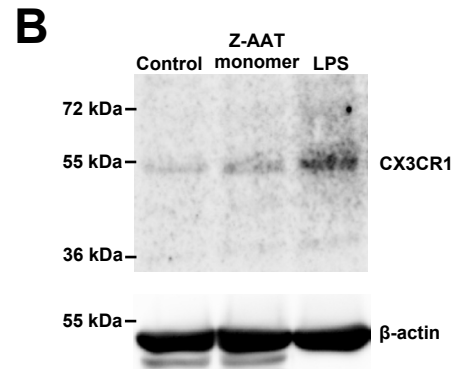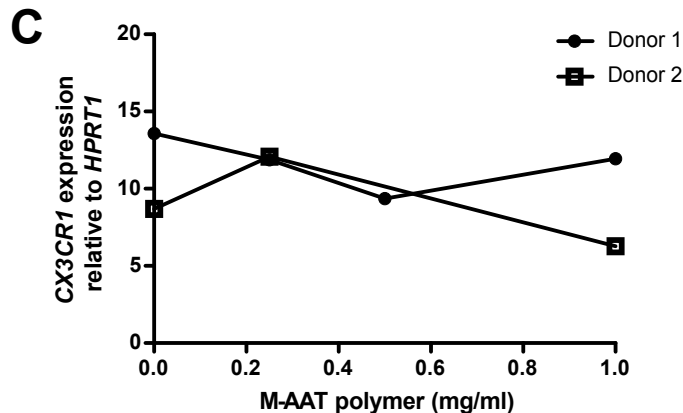

Supplement: supp [file elife-64881-supp-v1.zip]

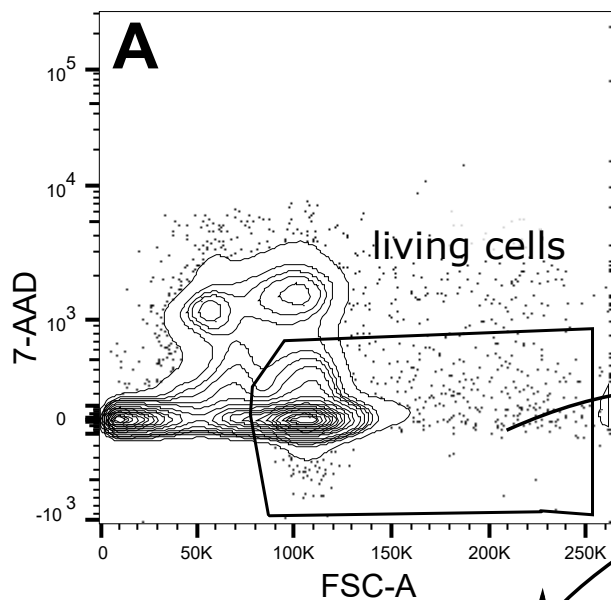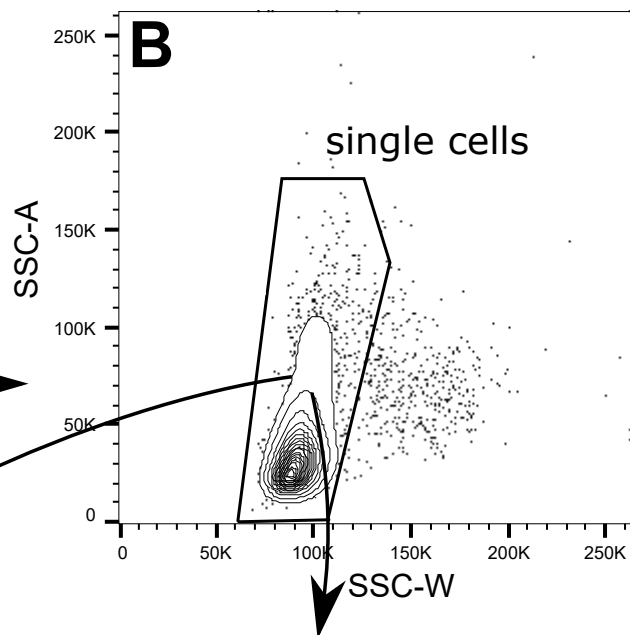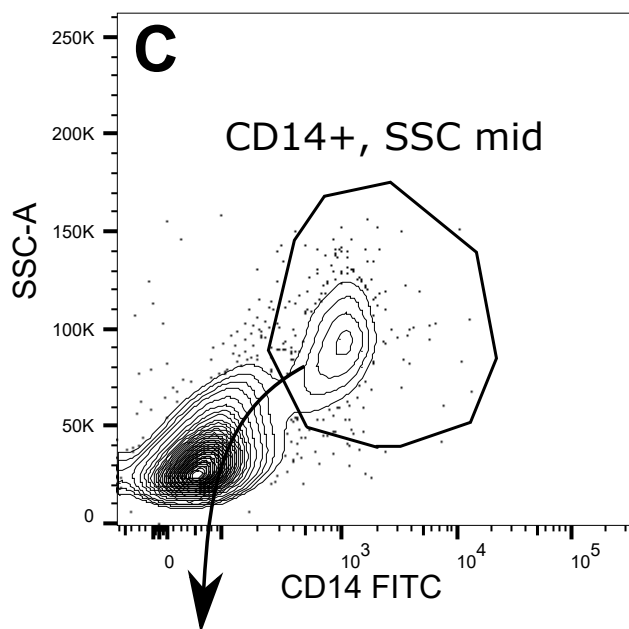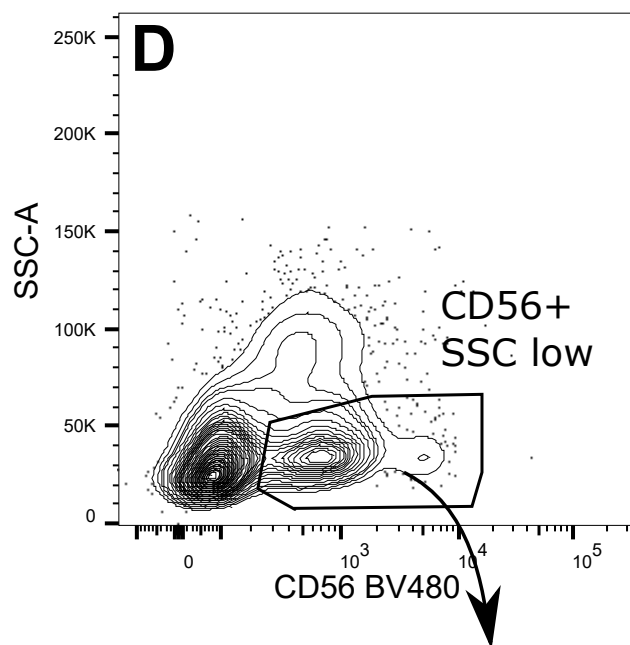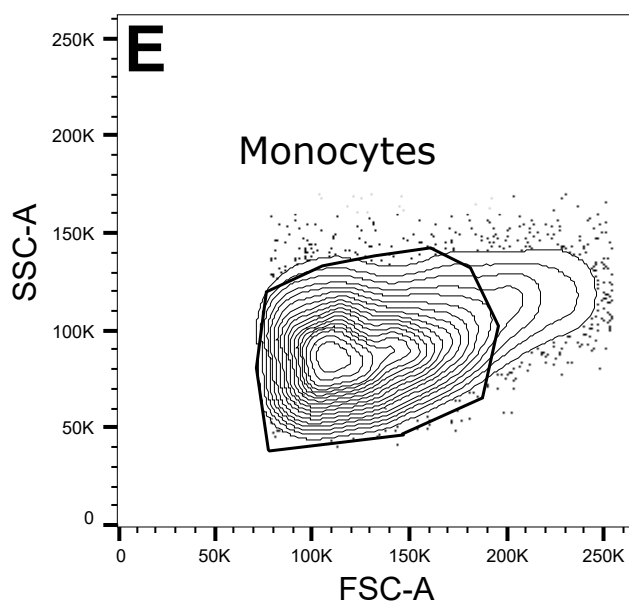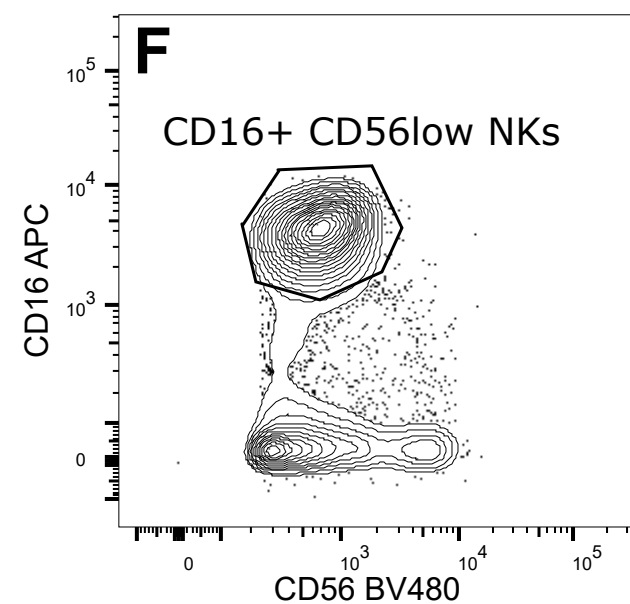

Supplement: supp [file elife-64881-supp-v1.zip]

CX3CR1 expression relative to  
housekeeping gene *HPRT1*

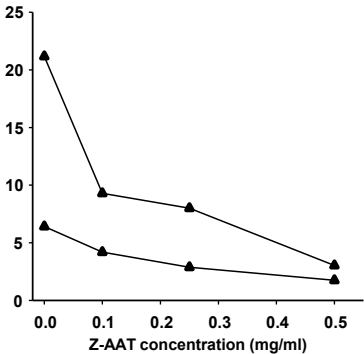

Supplement: supp [file elife-64881-supp-v1.zip]

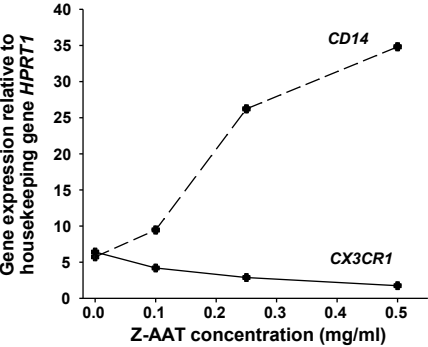

Supplement: supp [file elife-64881-supp-v1.zip]

**a**

Control

M-AAT

Z-AAT

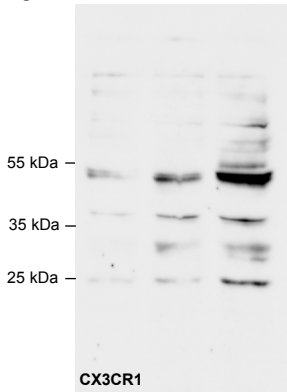**b**

Control

M-AAT

Z-AAT

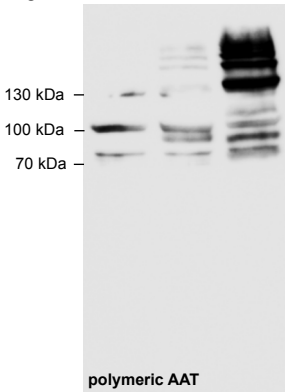

Supplement: supp [file elife-64881-supp-v1.zip]

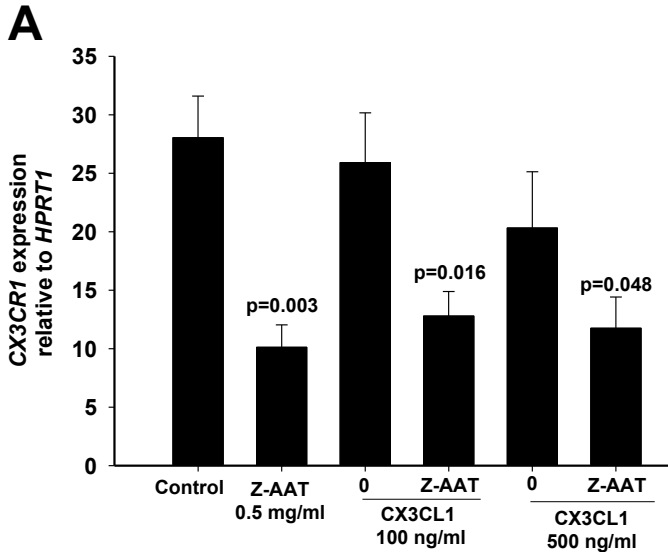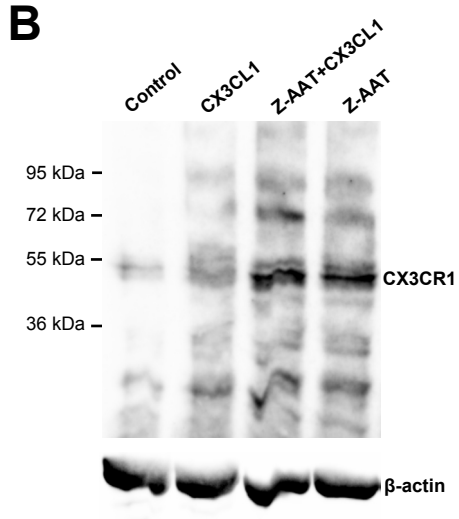

Supplement: supp [file elife-64881-supp-v1.zip]

**A**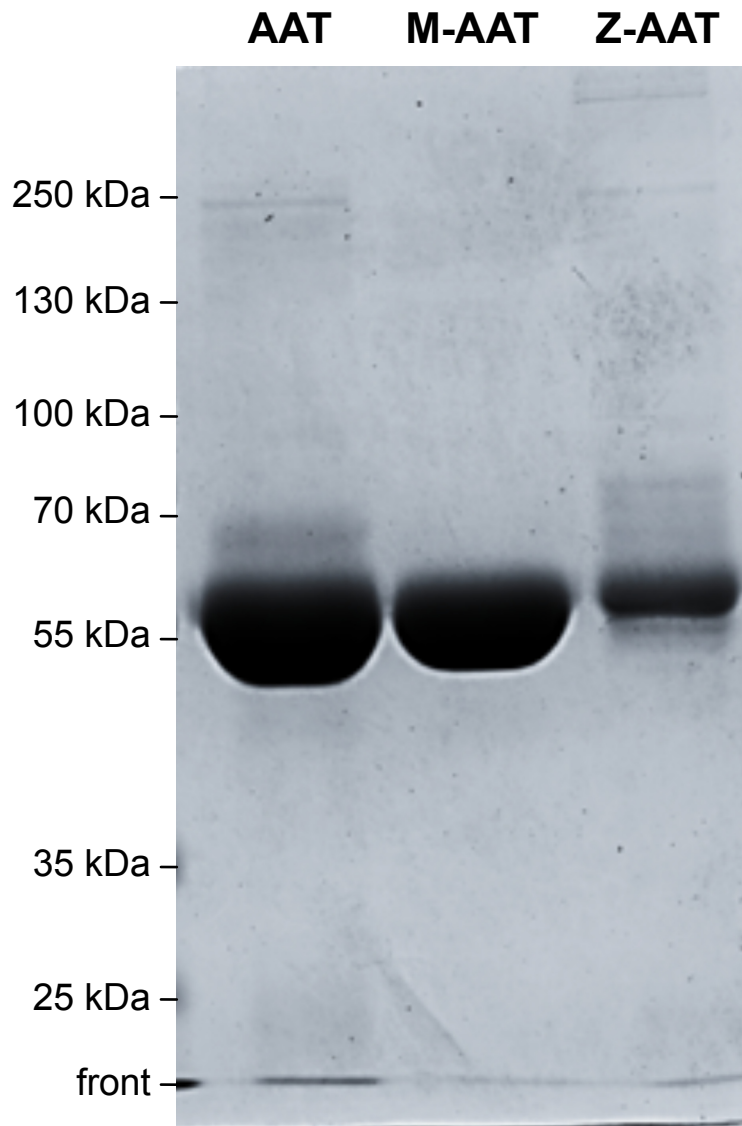**B**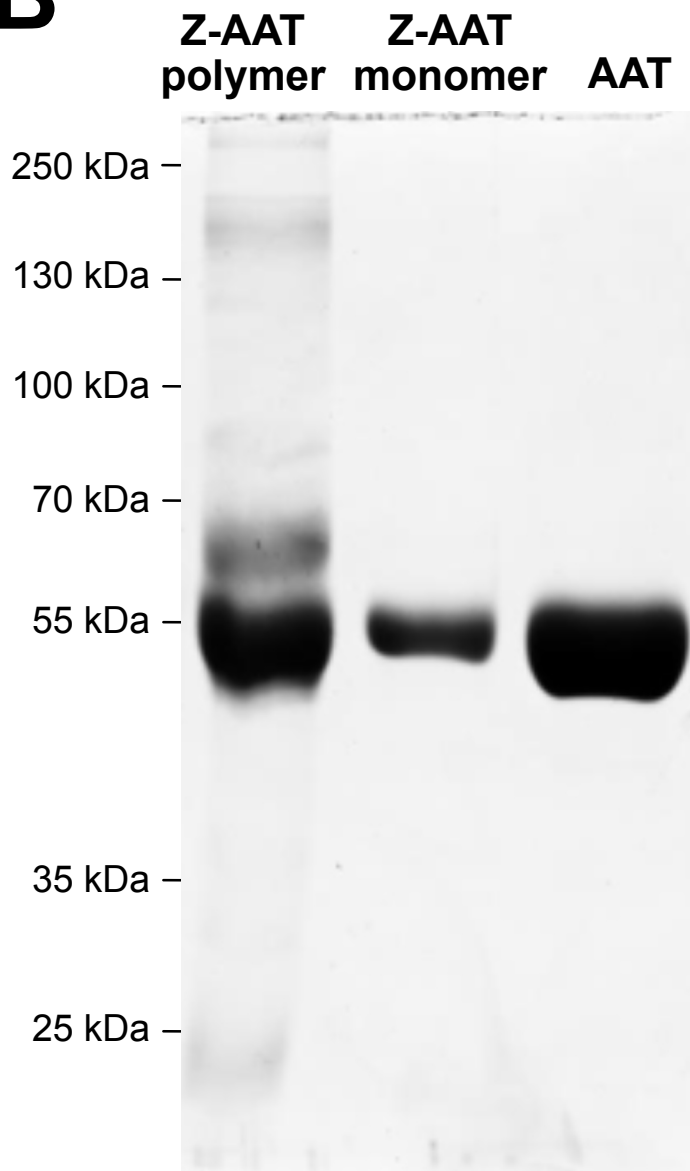

Supplement: supp [file elife-64881-supp-v1.zip]

**a**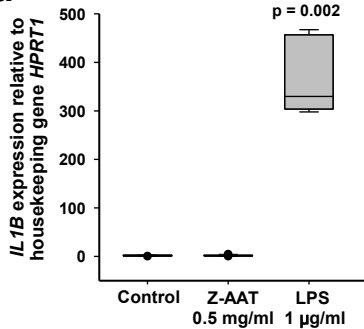**b**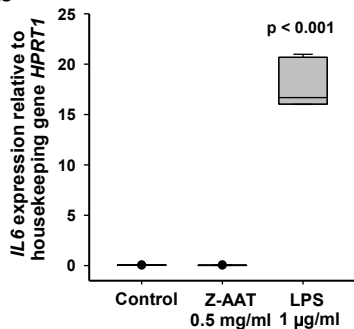**c**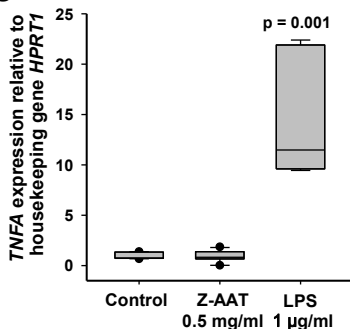

Supplement: supp [file elife-64881-supp-v1.zip]
